# Supplementary material for: CD39 and CD326 Are Bona Fide Markers of Murine and Human Plasma Cells and Identify a Bone Marrow Specific Plasma Cell Subpopulation in Lupus
Source: PubMed Central journal article supplement (PMC9024045; doi:10.3389/fimmu.2022.873217), 2022-04-08

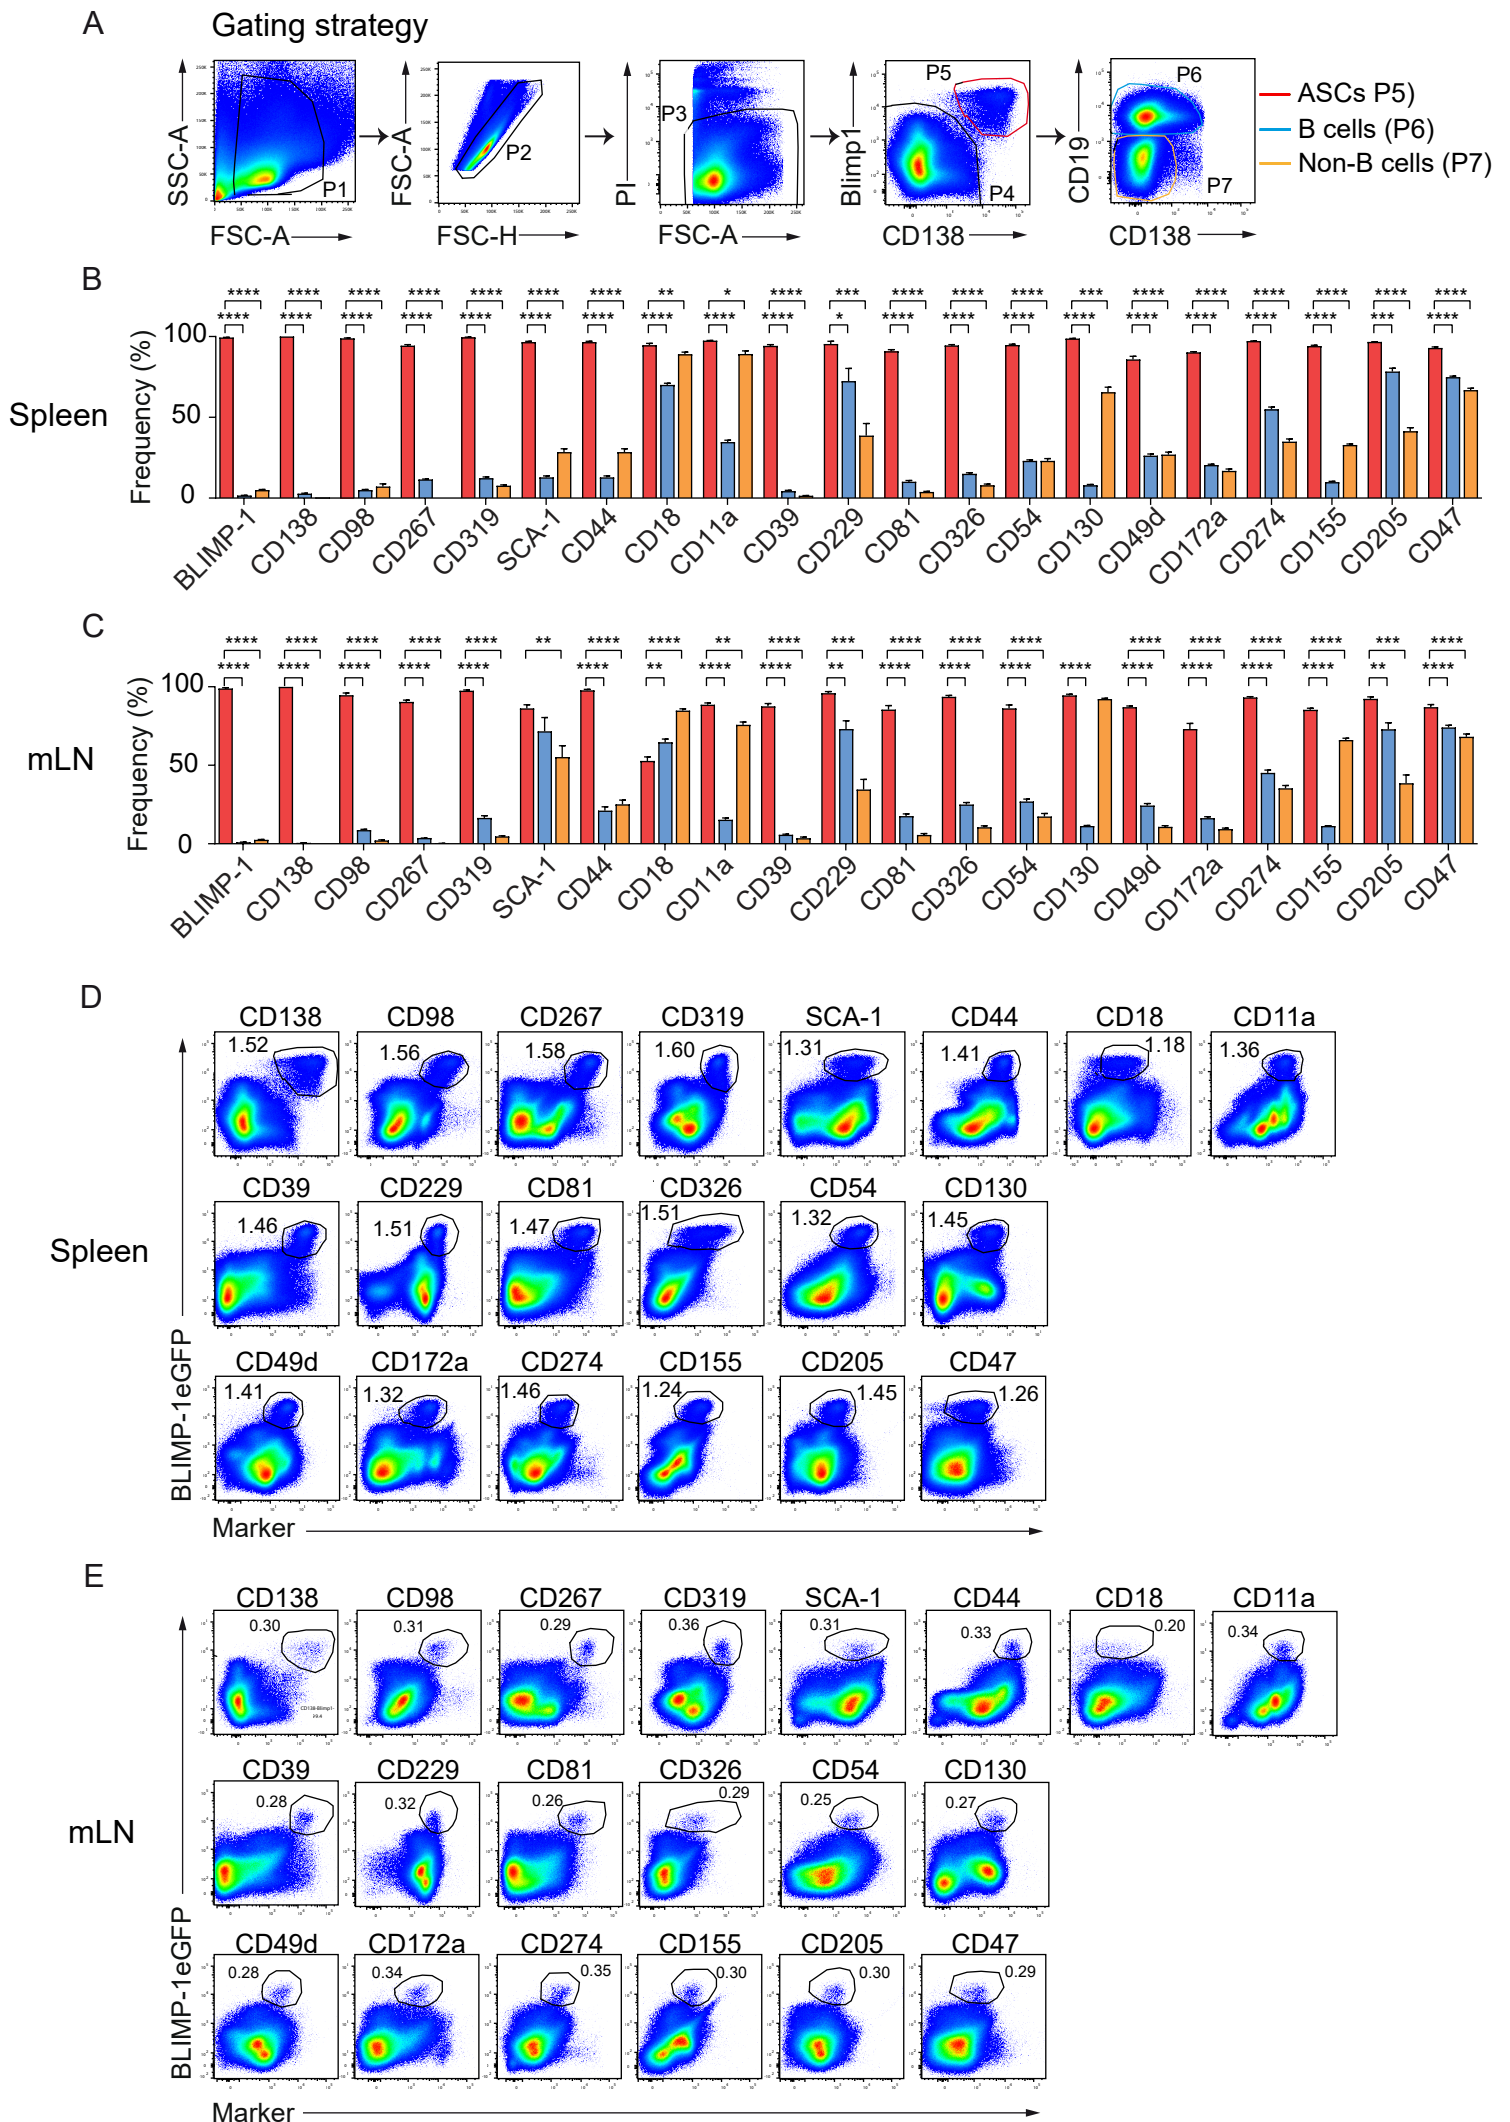

Supplementary Figure 1

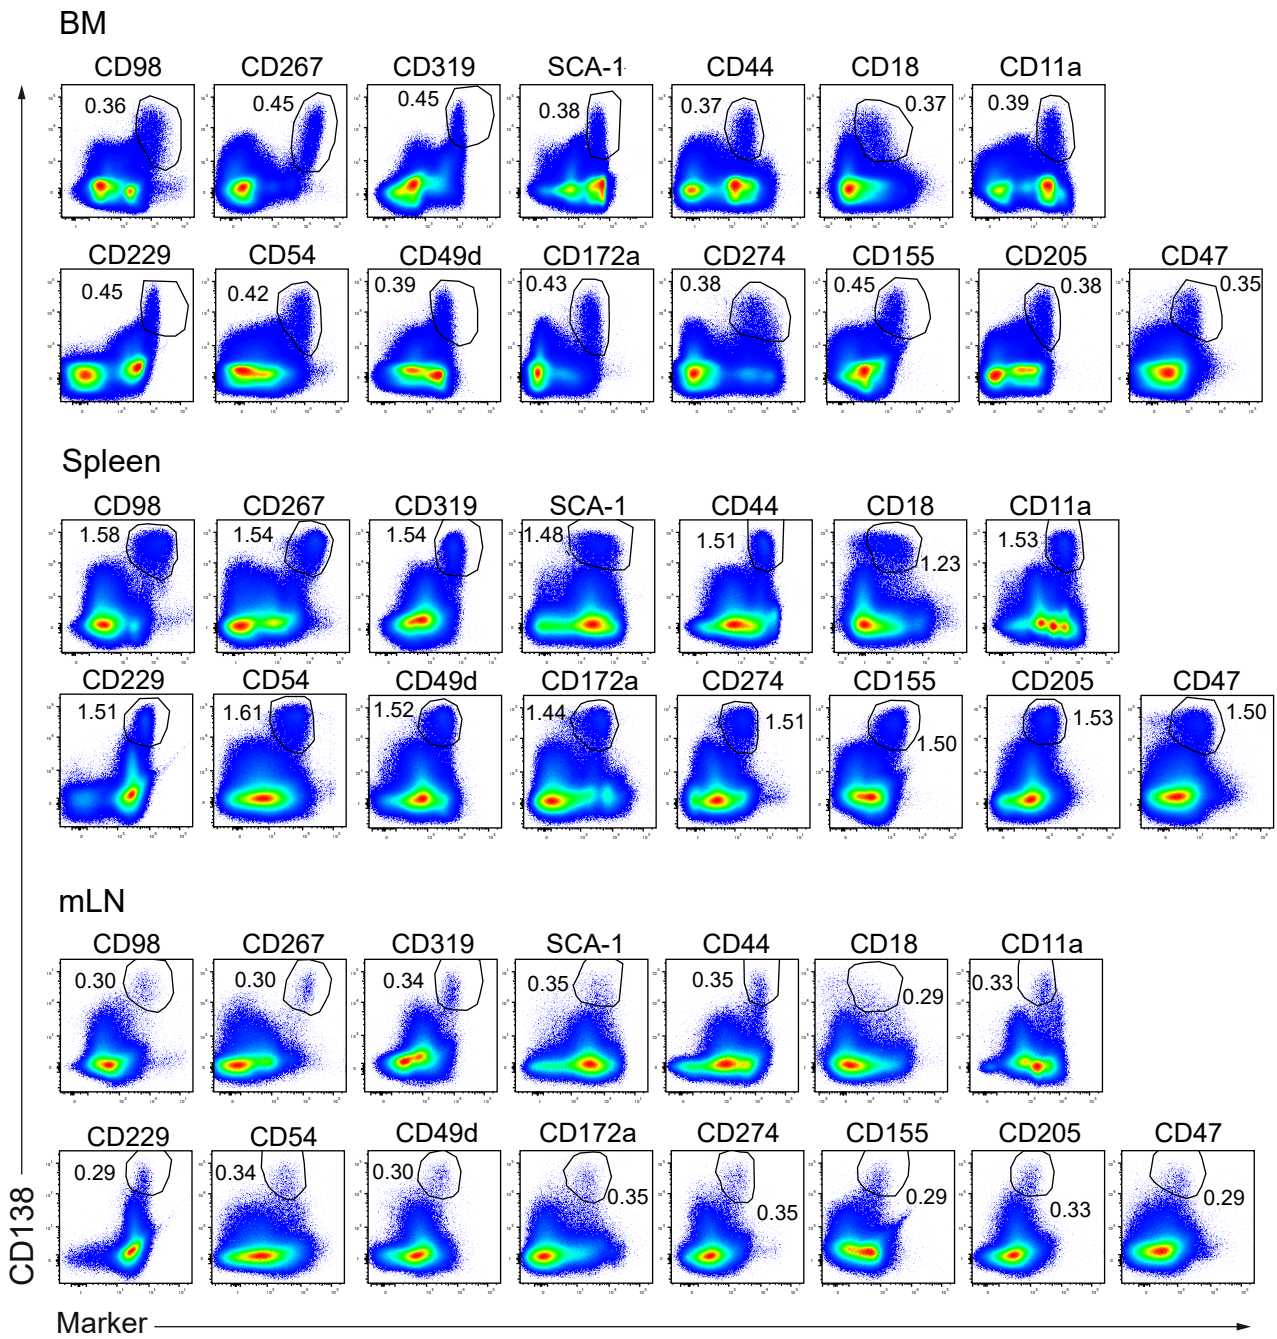

Supplementary Figure 2

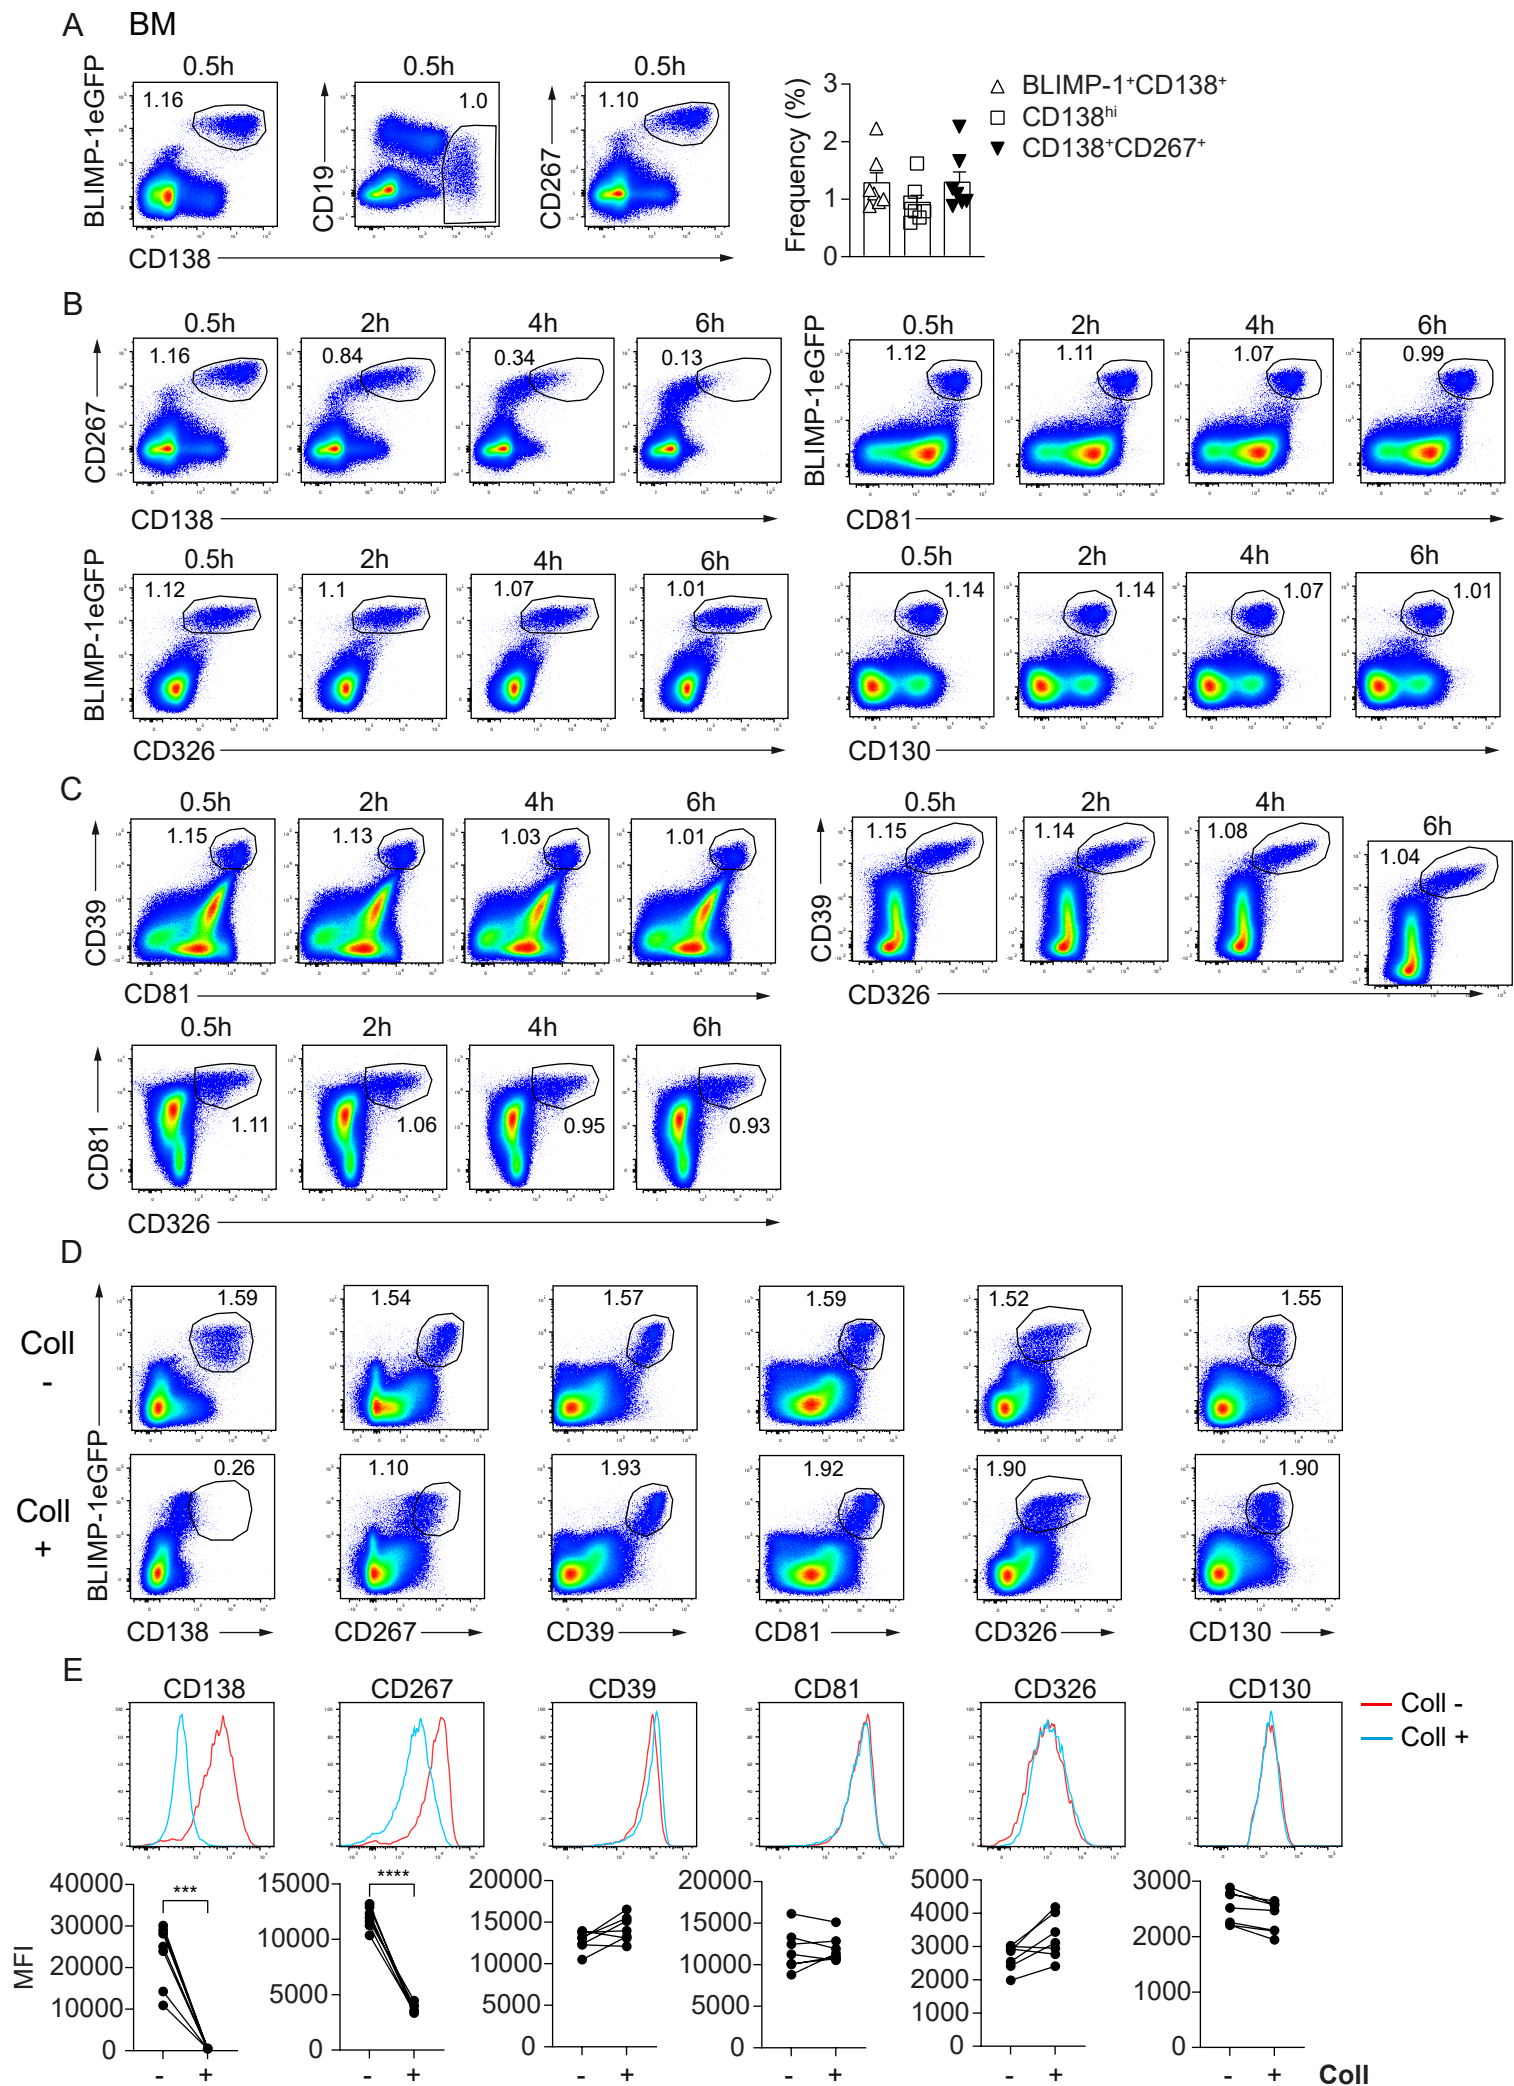

Supplementary Figure 3

**A Peripheral blood**

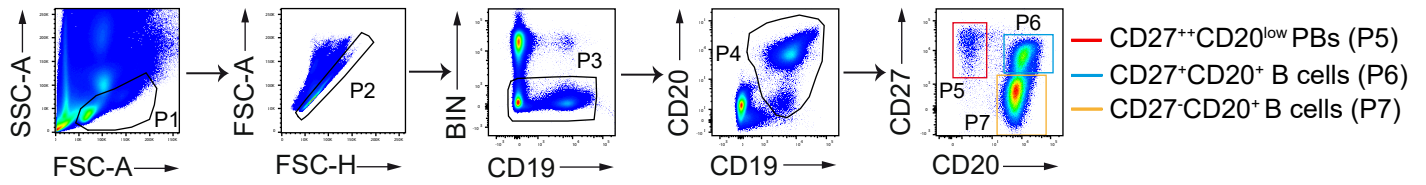

**B BM**

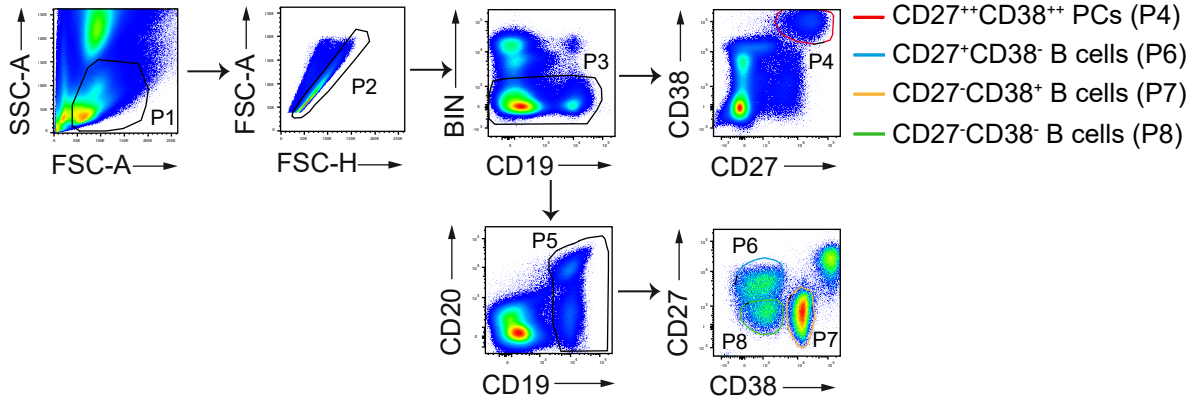

**C**

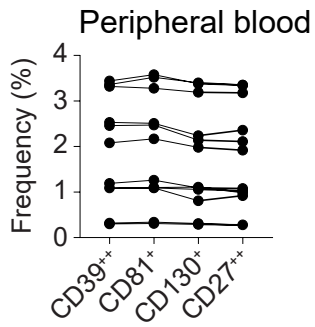

**D**

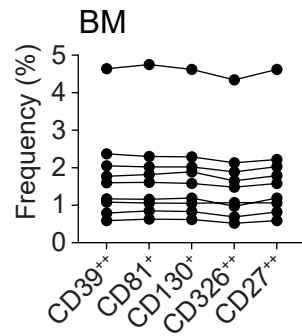

**E BM**

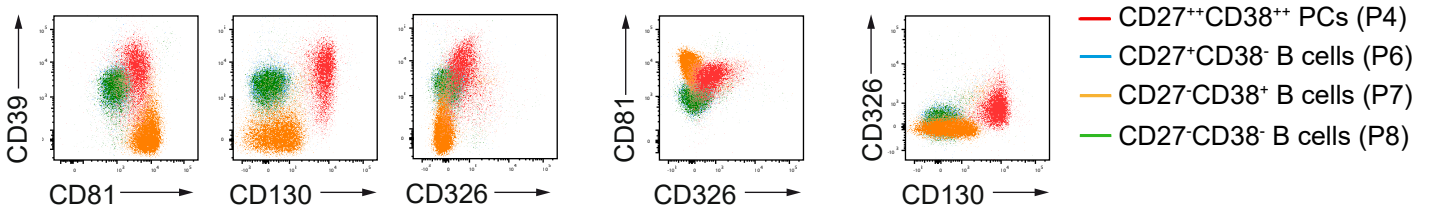

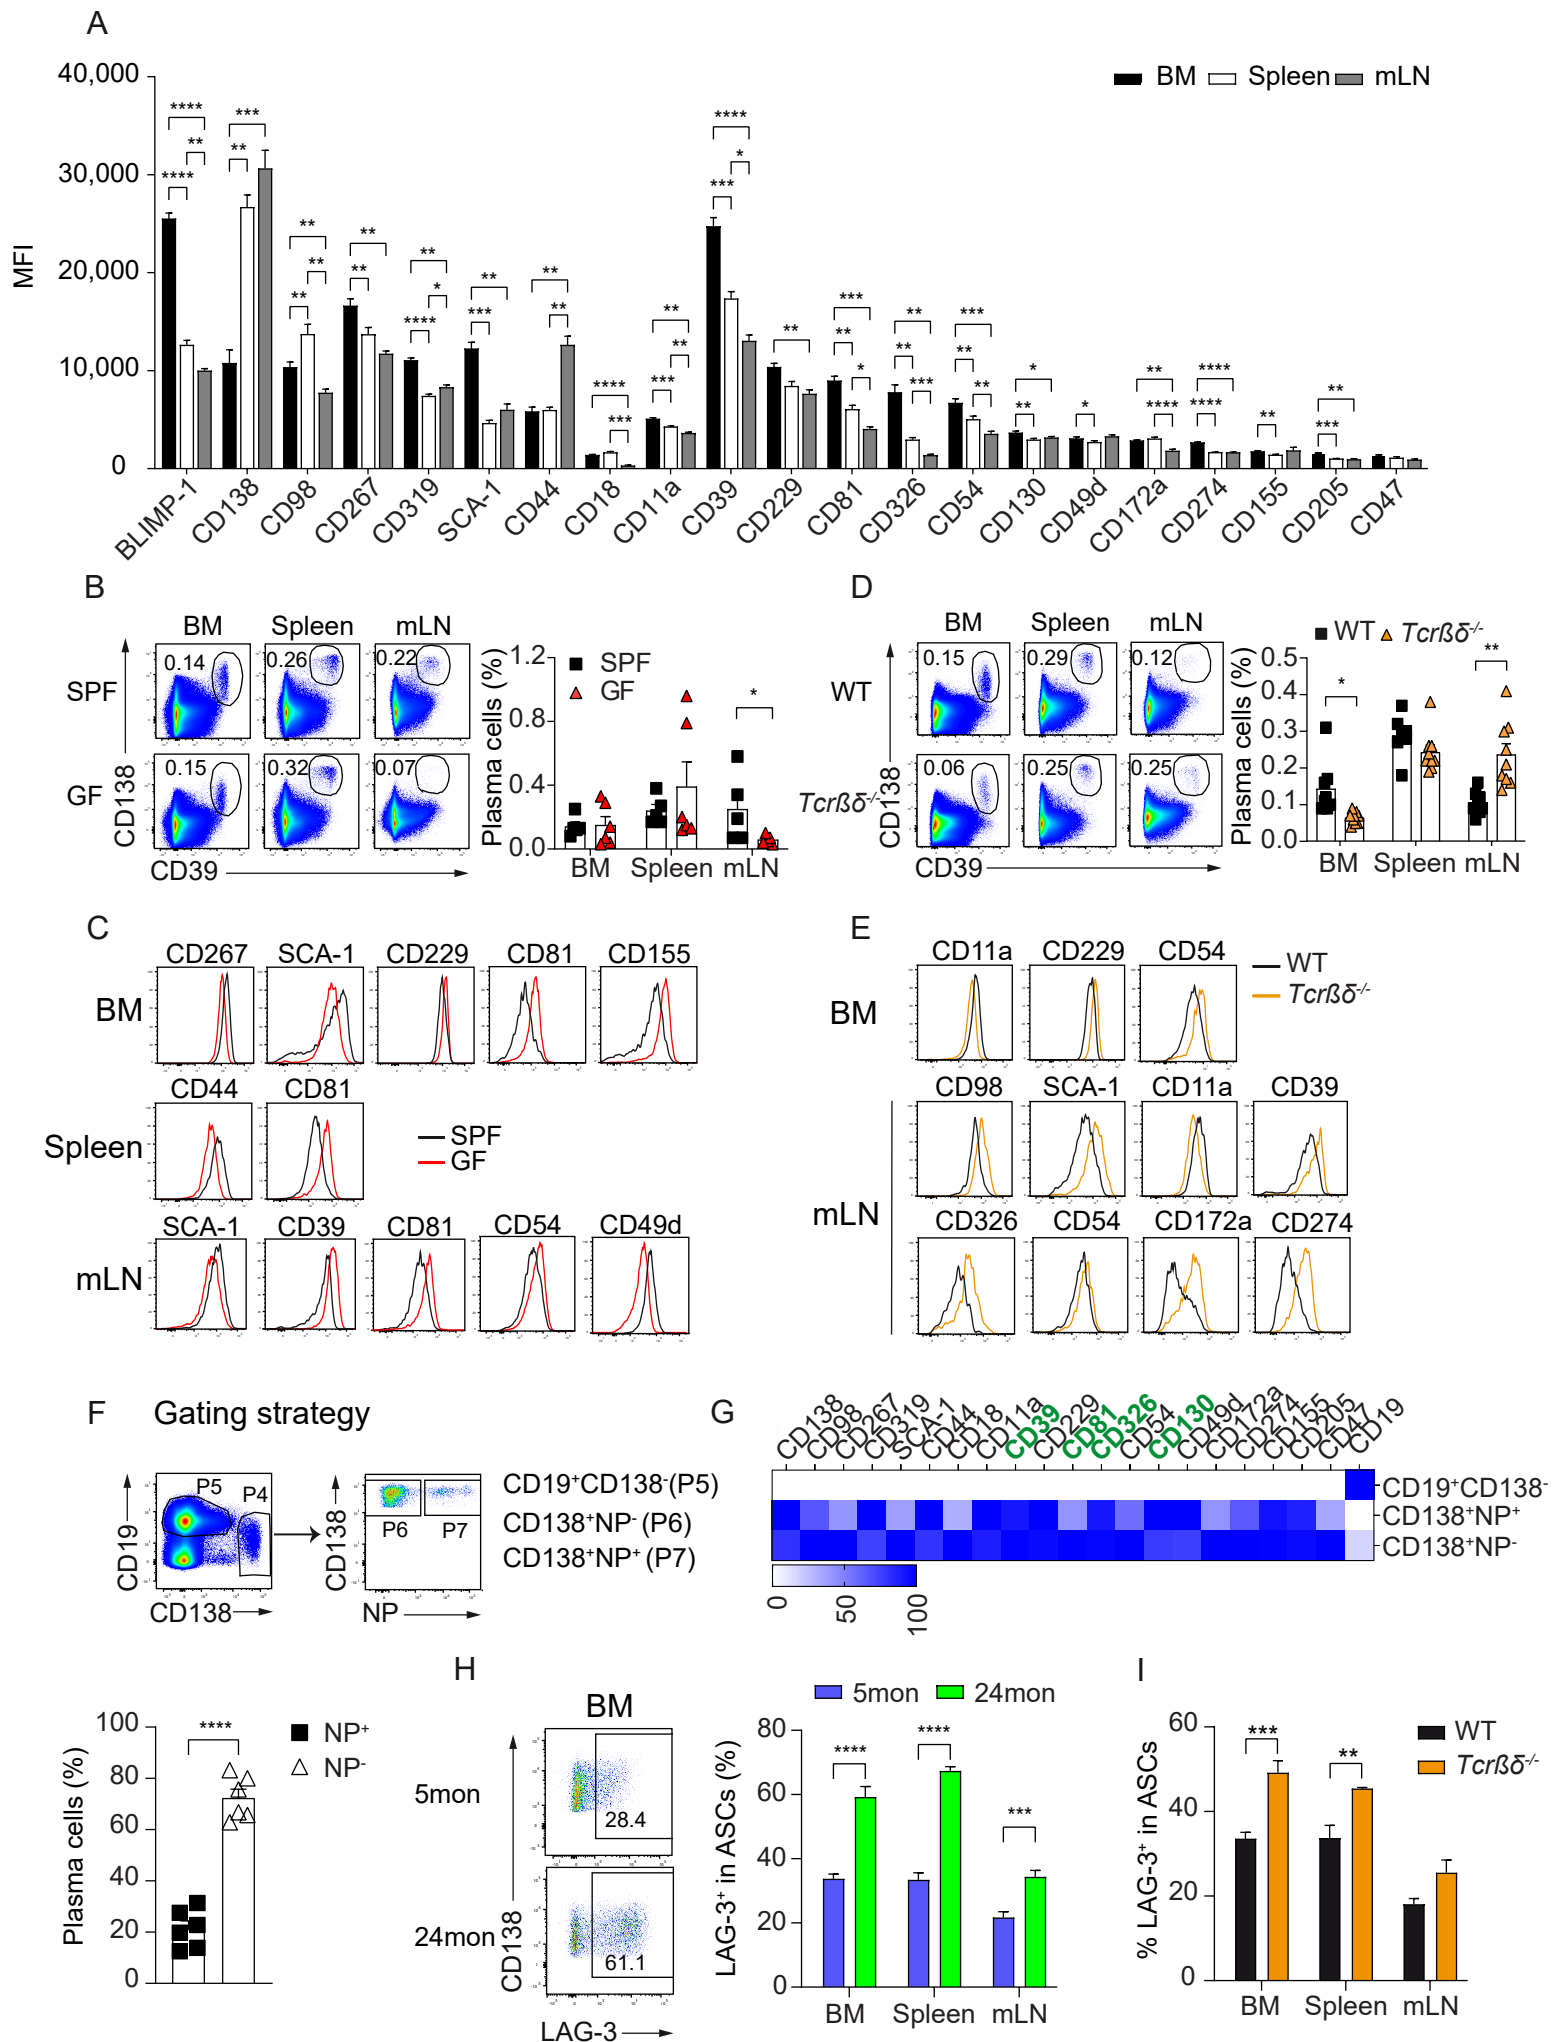

Supplementary Figure 5

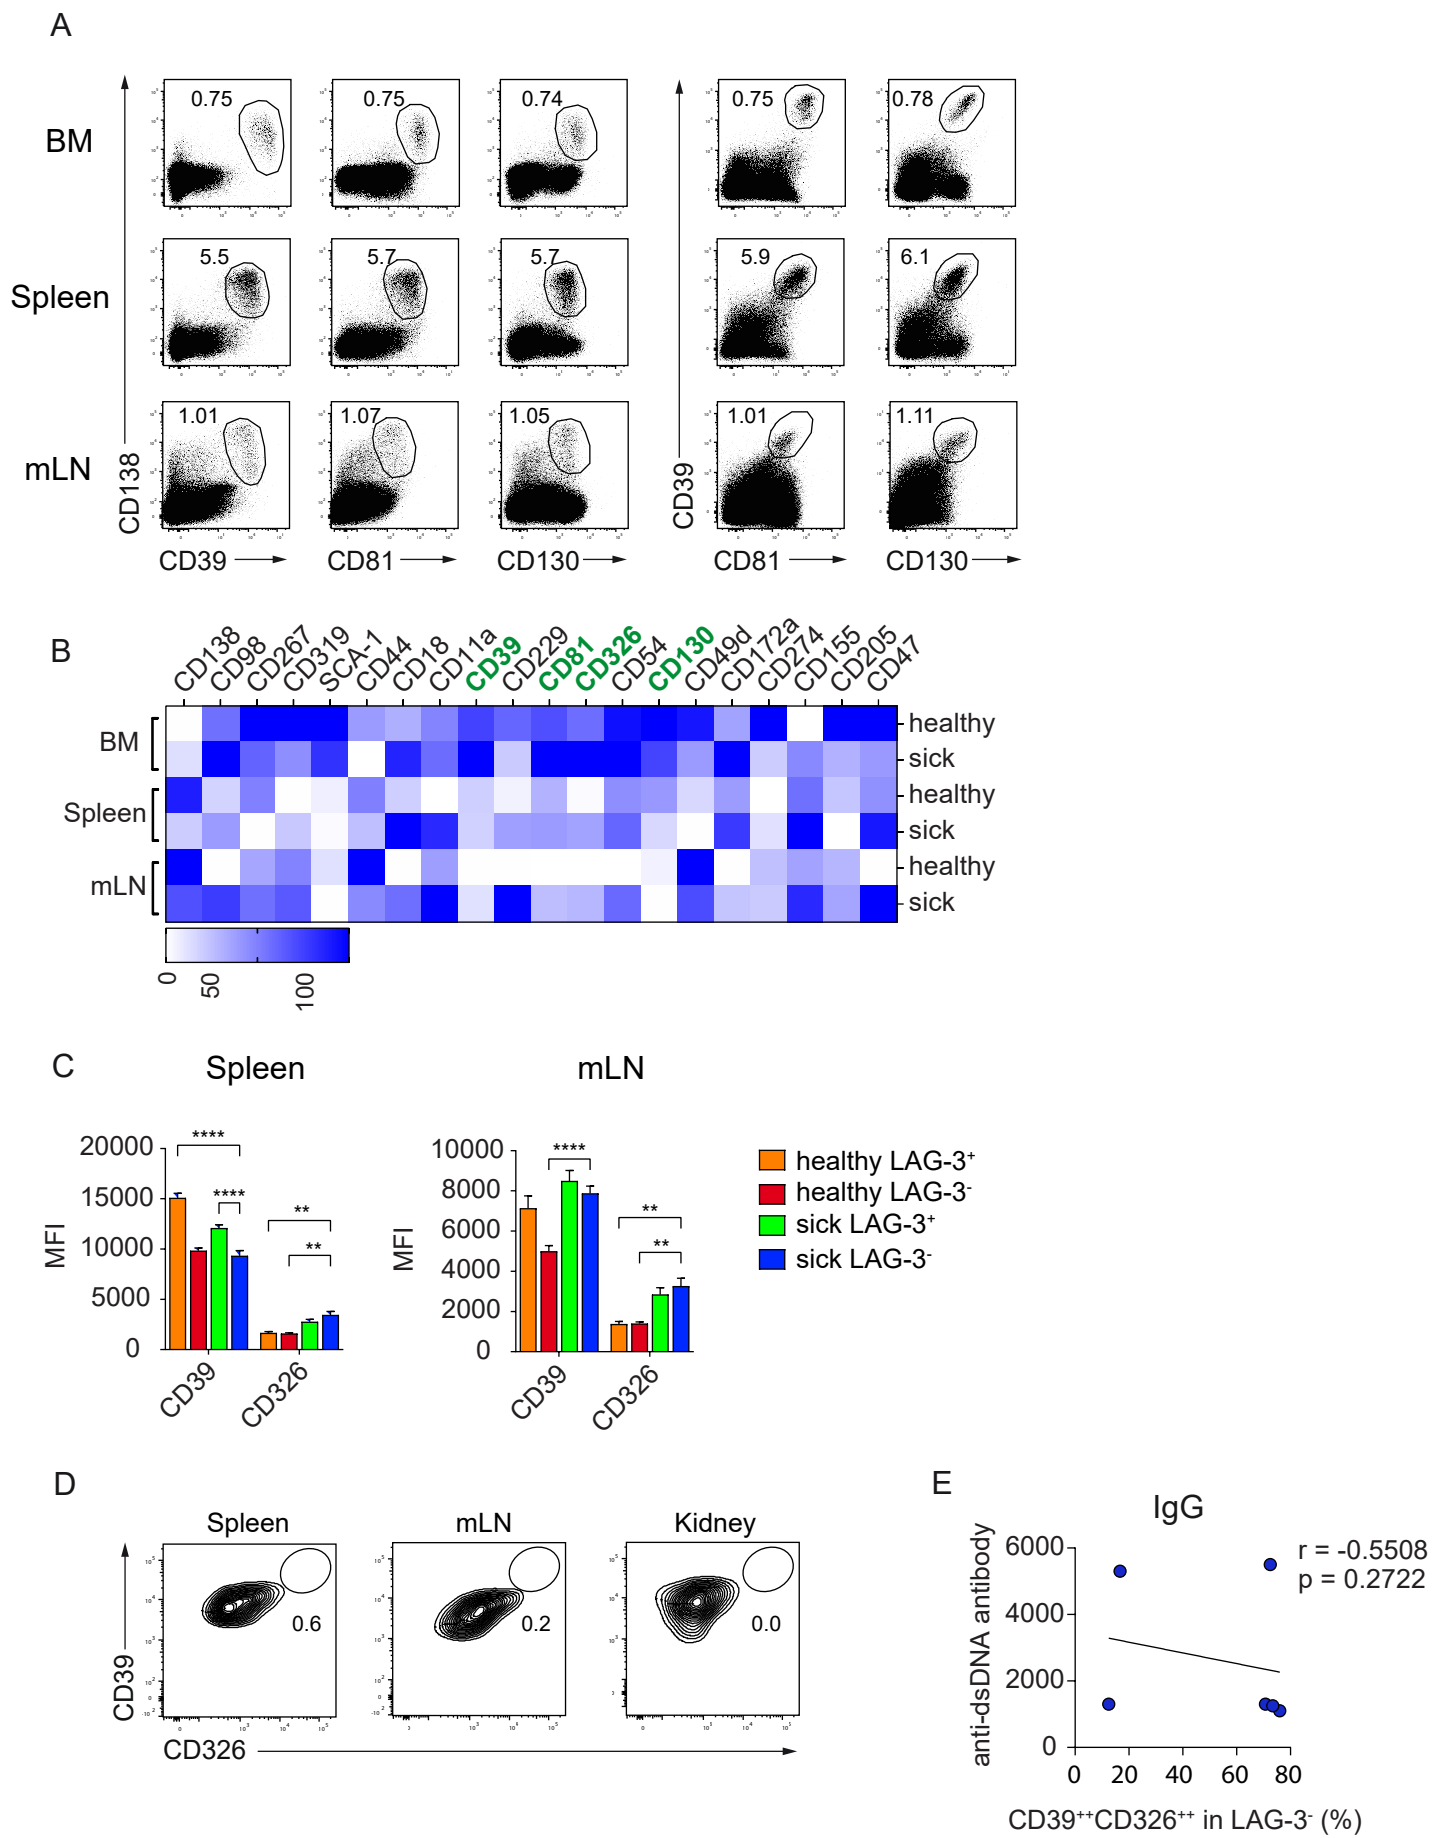

Supplement: DataSheet_1.pdf [file DataSheet_1.pdf]
